# Supplementary material
Source: PubMed Central journal article supplement (PMC3153593)
Supplement: NIHMS312893-supplement-1_si_001.pdf [file NIHMS312893-supplement-1_si_001.pdf]

## Supplemental Table 1. Oligonucleotides<sup>1</sup> used in this study

---

### LeadP122

CGTGACTTGATGTTAACCCCTAACCCCTAAGATATCGCGTTAAGTGAGTGTGAGGATACATGT-  
AGGCAATTGCCACGTGTCTATCAGCTGAAGTACAAGCGCTGCACGCTAGCAGCGACGCTGC

### LagP122

CGTCGCAGCGACGATCGCACGTCGCGAACAACCTCAGCTGATAGACACGTGGCAATTGCCT-  
ACATGTATCCTCACACTCTGAATACGCGATATCTTAGGGTTAGGGTTAACATCAAGTCACG

### LeadD81

GCAGCGTCGCTGCTAGCGTGCAGCGCTTGTGAAGAGCTGATAGACACGTGGCAATTGCCT-  
ACATGTATCCTCACACTCAC

### LagD84

ATTCAGAGTGTGAGGATACATGTAGGCAATTGCCACGTGTCTATCAGCTCTTCATGTTCCG-  
GACGTGCGATCGTCGCTGCGACG

### 3-way-base62

CACTGACTCCAGGAAGTGGAGGATGCCTAGGTGGCCAGCTGCCGTCCAGACTCAGAGGAG-  
TG

### 3-way-5'flap

TCACTTGACAAGTGACTGTGACCTAGGCATCCTCCAGTTCCTGGAGTCAGTG

### 3-way-3'flap

CACTCCTCTGAGTCTGGACGGCAGCTGGCCAAGTGTGAGTGTGAGTGTGAGT

### LagP70

GCTATCGTACATGATATCCTCAGACTCTGAATAGCCGAATTCTTAGGGTTAGGGTTAACAT-  
CAAGTCACG

### LagD30

TCAGAGTGTGAGGATATCATGTACGATAGC

---

<sup>1</sup> All oligonucleotides are represented in 5' to 3' orientation.
