# Supplementary material
Source: PubMed Central journal article supplement (PMC3153593)

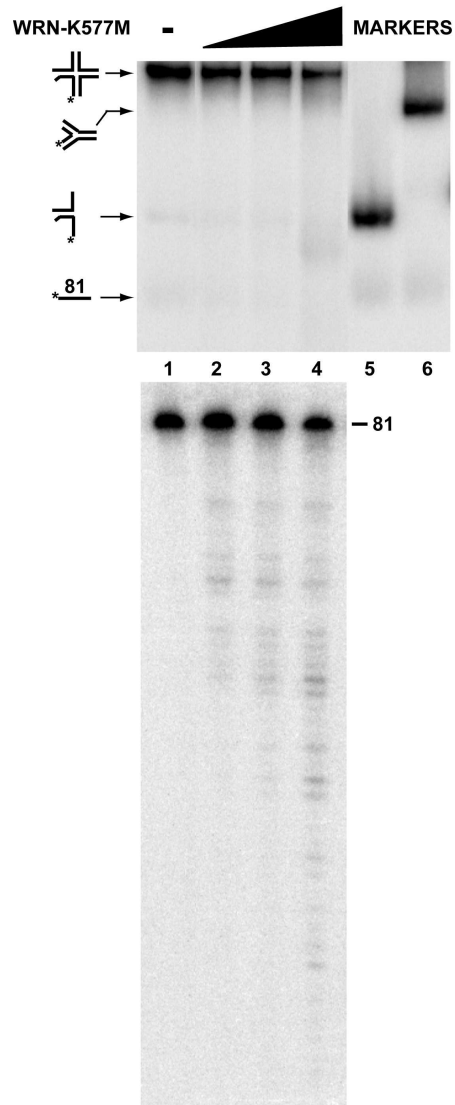

**Supplemental Figure 1**

120x256mm (300 x 300 DPI)

Supplement: NIHMS312893-supplement-3_si_003.pdf [file NIHMS312893-supplement-3_si_003.pdf]

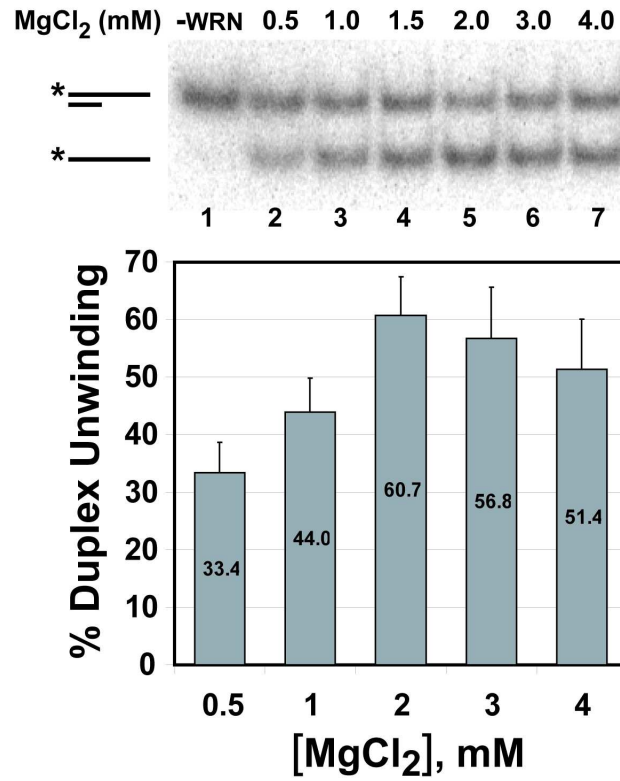

## Supplemental Figure 2

133x190mm (300 x 300 DPI)

Supplement: NIHMS312893-supplement-4_si_004.pdf [file NIHMS312893-supplement-4_si_004.pdf]

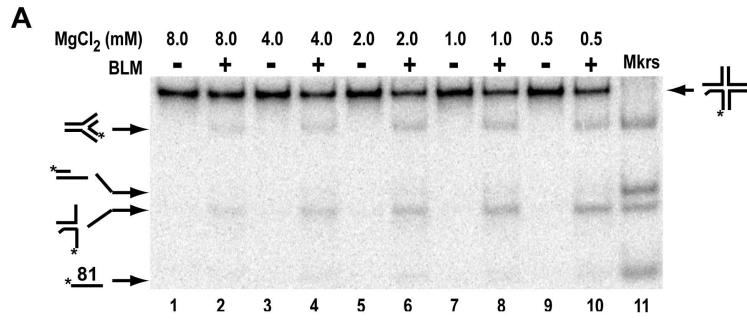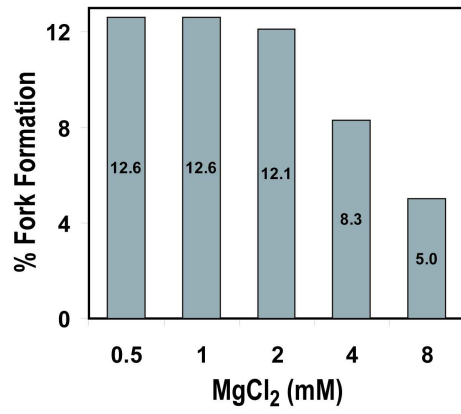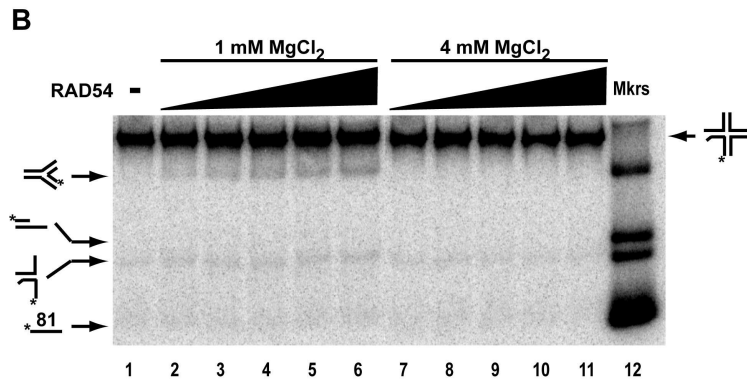

**Supplemental Figure 3**

205x264mm (300 x 300 DPI)

Supplement: NIHMS312893-supplement-5_si_005.pdf [file NIHMS312893-supplement-5_si_005.pdf]

**A**

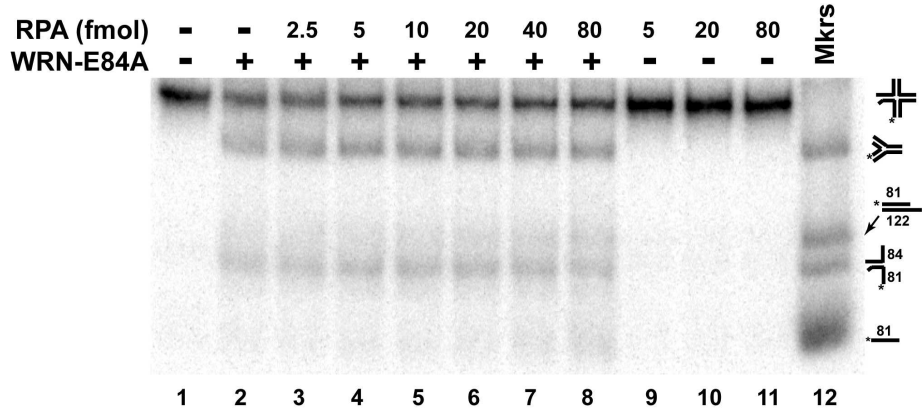

**B**

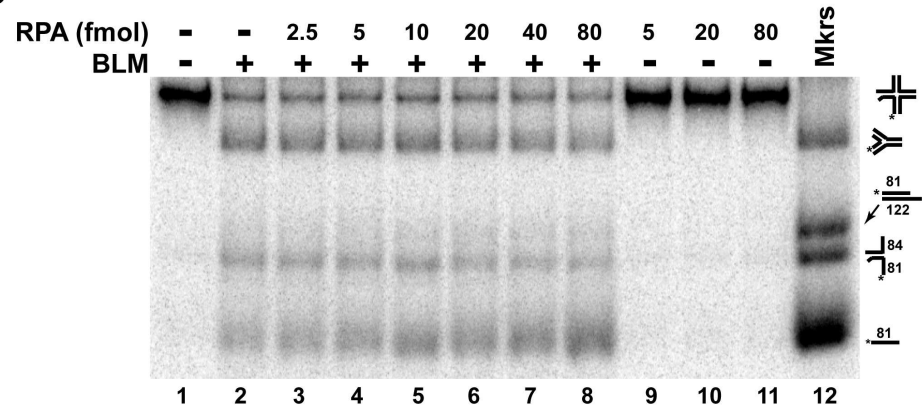

### Supplemental Figure 4

176x223mm (300 x 300 DPI)

Supplement: NIHMS312893-supplement-6_si_006.pdf [file NIHMS312893-supplement-6_si_006.pdf]

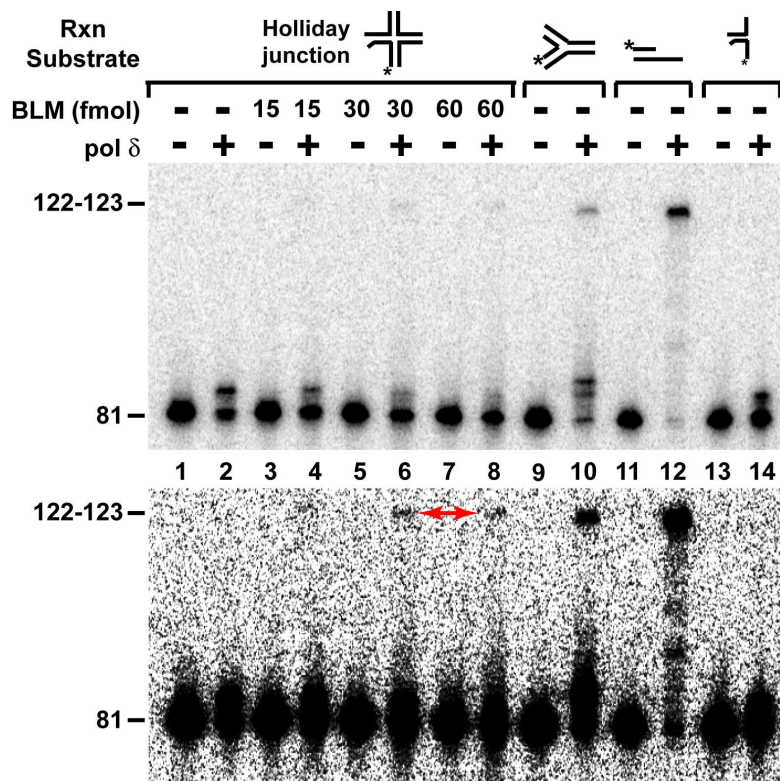

## Supplemental Figure 5

133x205mm (300 x 300 DPI)

Supplement: NIHMS312893-supplement-7_si_007.pdf [file NIHMS312893-supplement-7_si_007.pdf]
